# Supplementary material
Source: MDPI journal article supplement (https://www.mdpi.com/2073-4441/11/6/1310)
Supplement: s1 [file s1]

Archive with 2 entries (2 files):
- 54_RightsLink Printable License.pdf
- 89_RightsLink Printable License.pdf
